# Supplementary material for: Regulation of TSC2 lysosome translocation and mitochondrial turnover by TSC2 acetylation status
Source: PubMed Central journal article supplement (PMC11143182; doi:10.1038/s41598-024-63525-7), 2024-05-31

Figure 1B

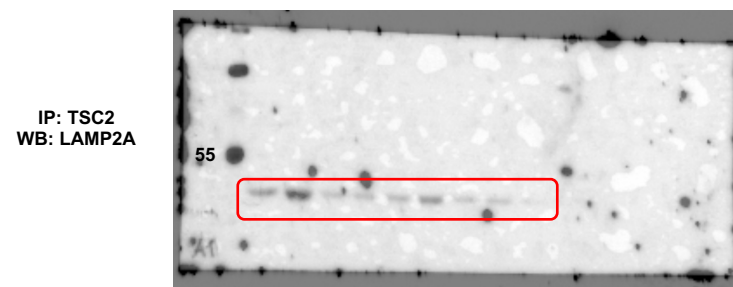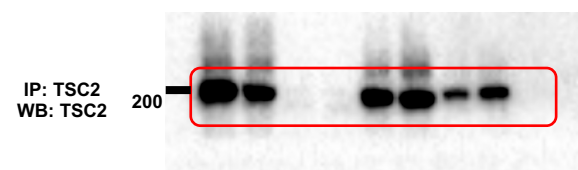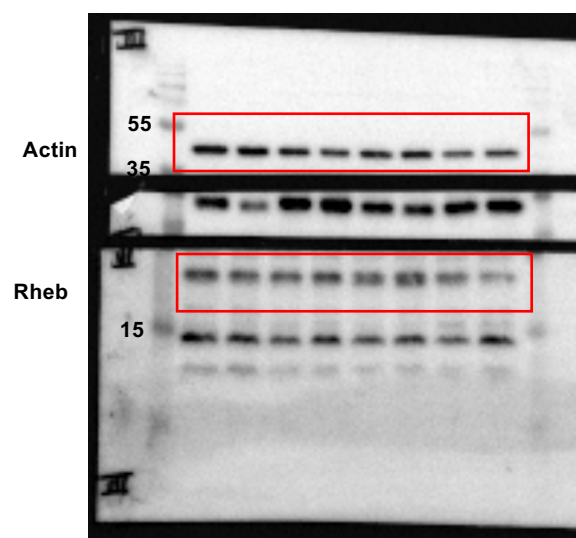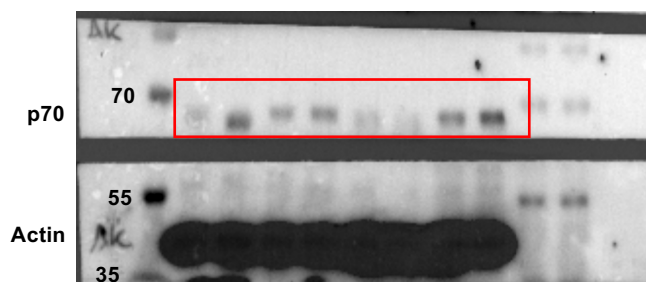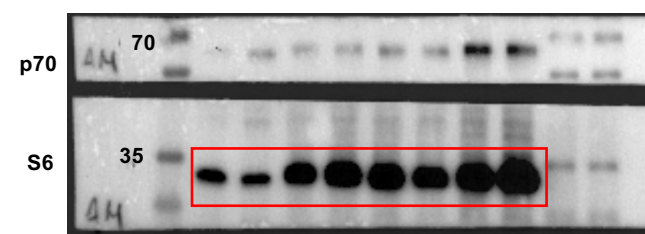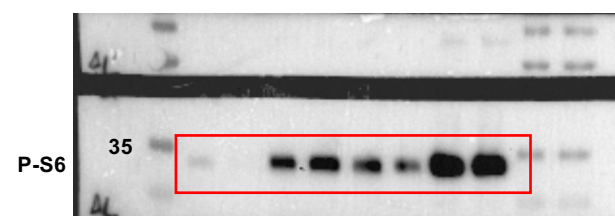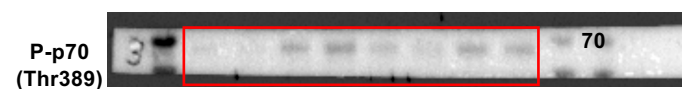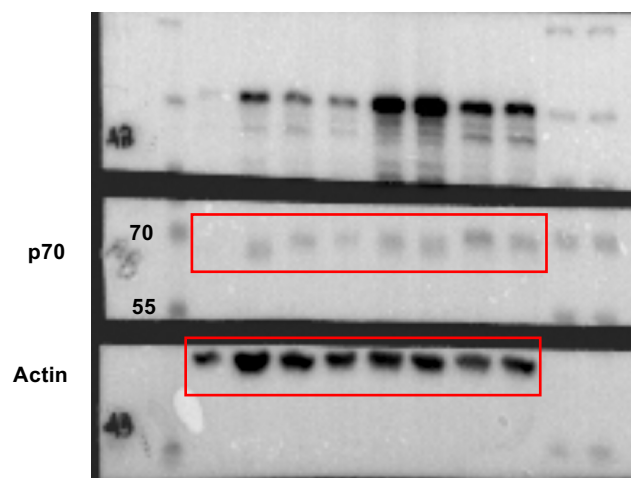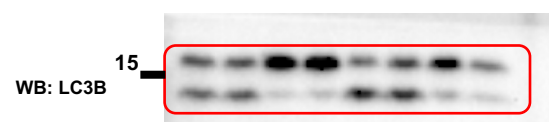

Figure 1C

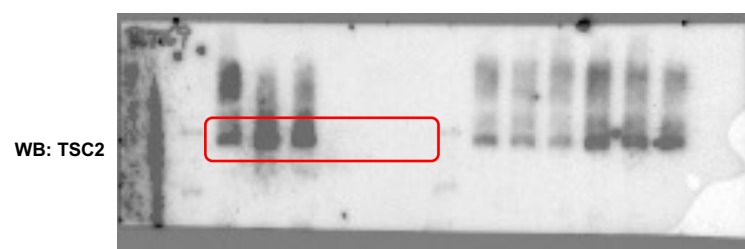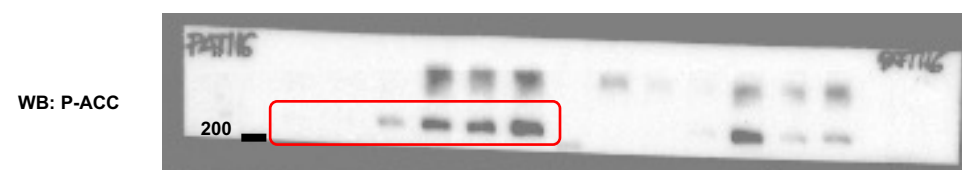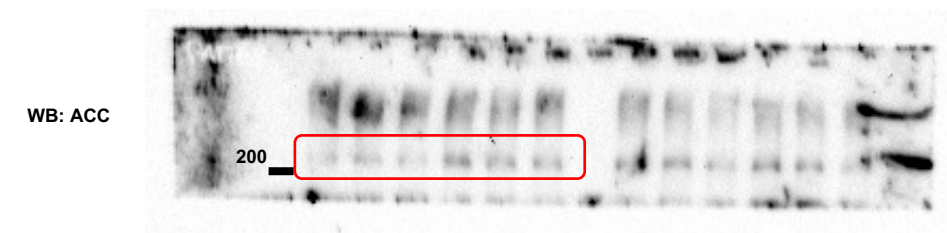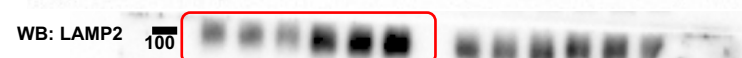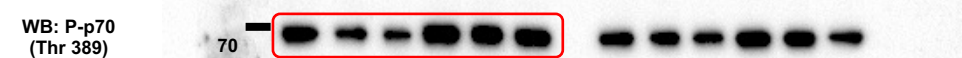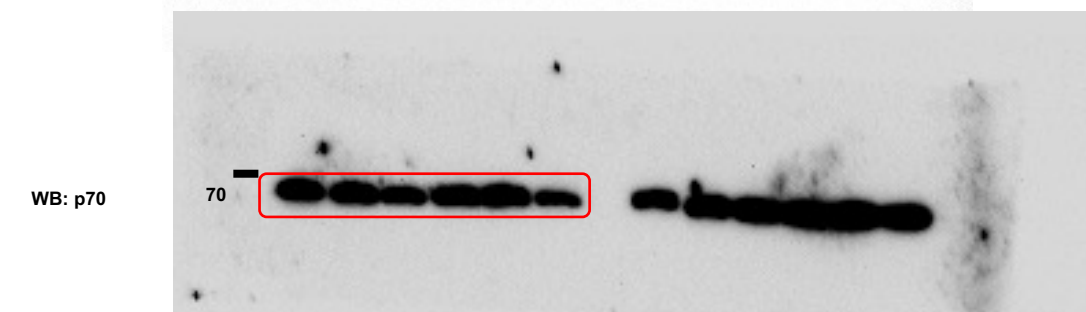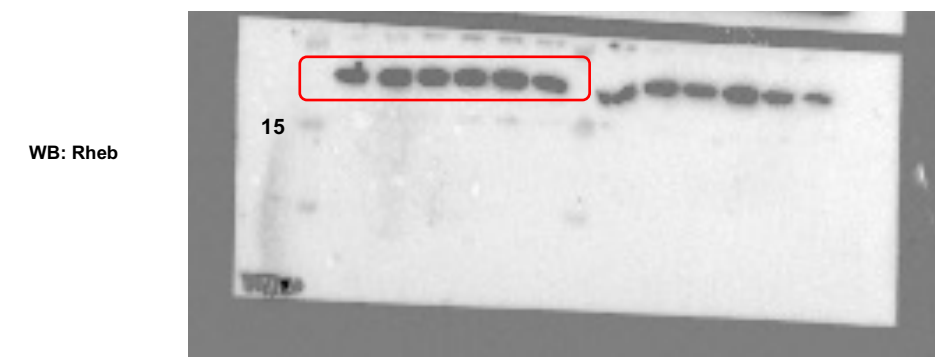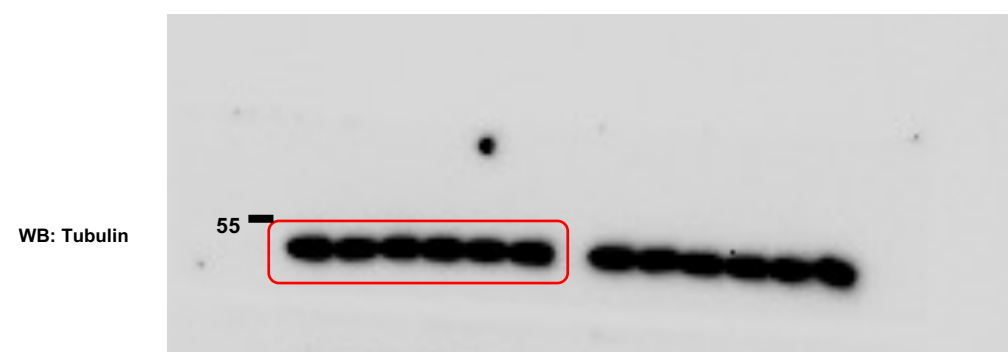

Figure 1D

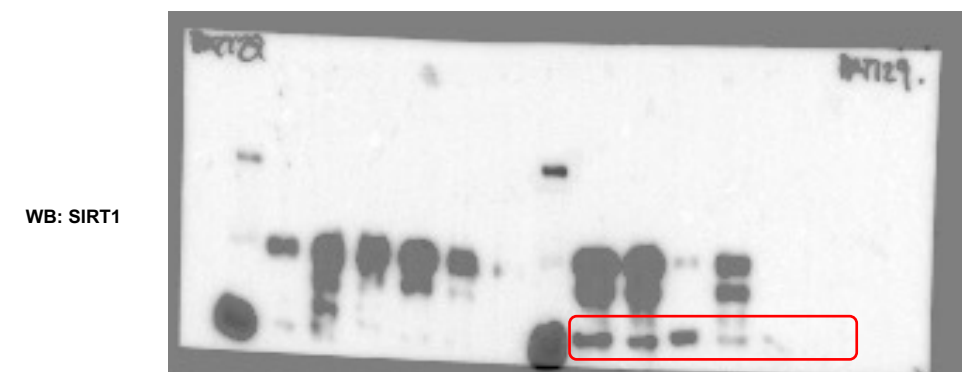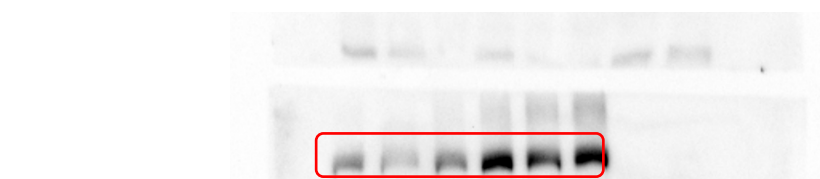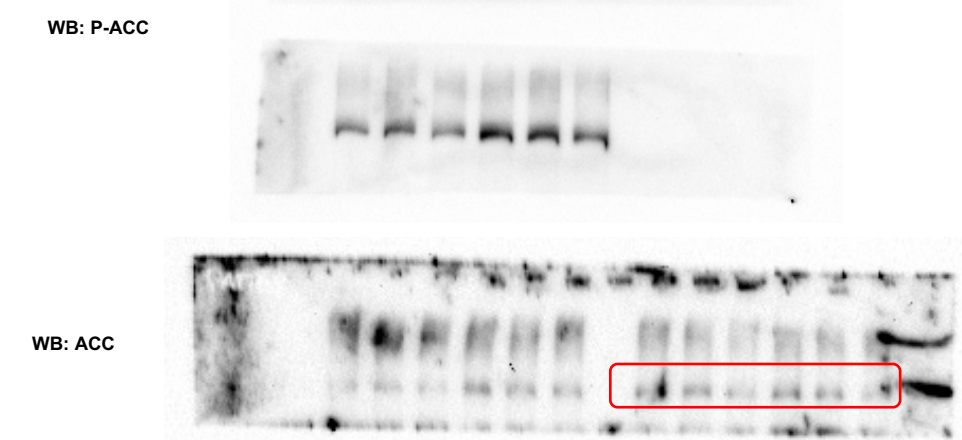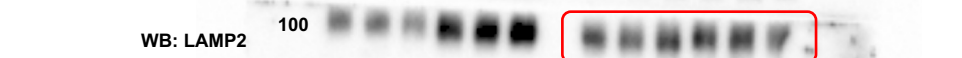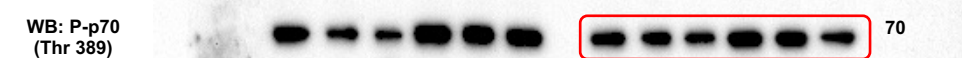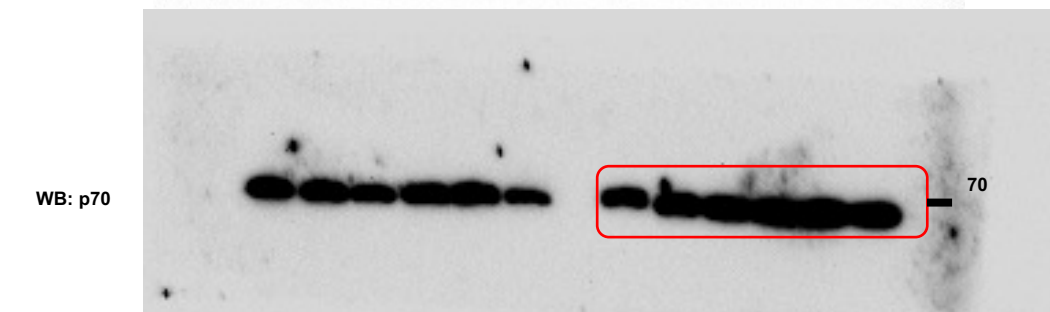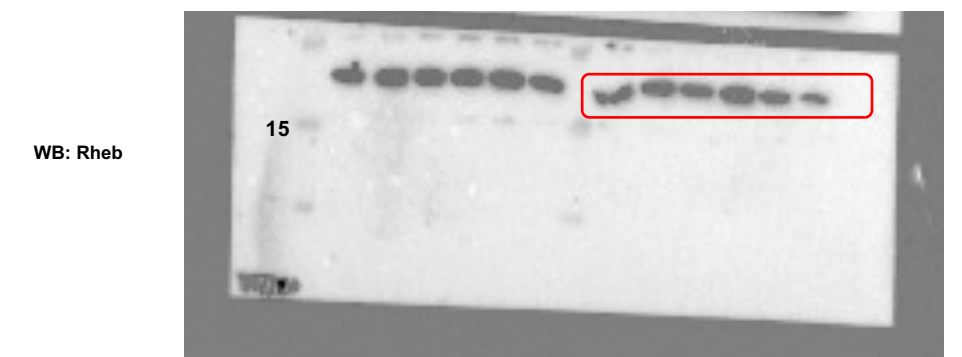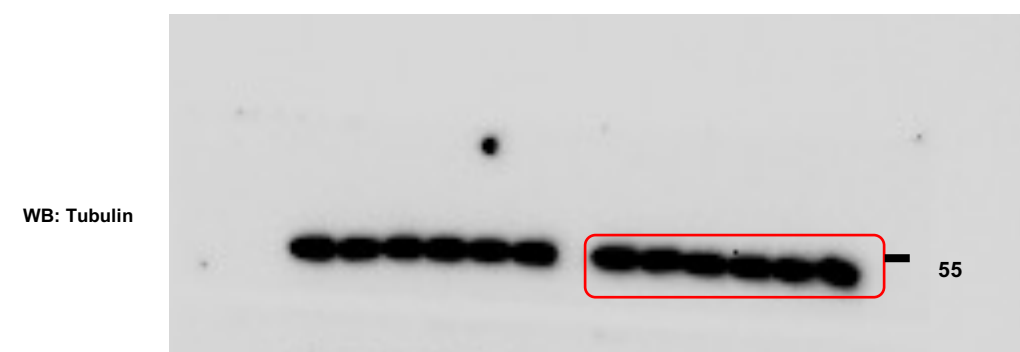

Figure 2D

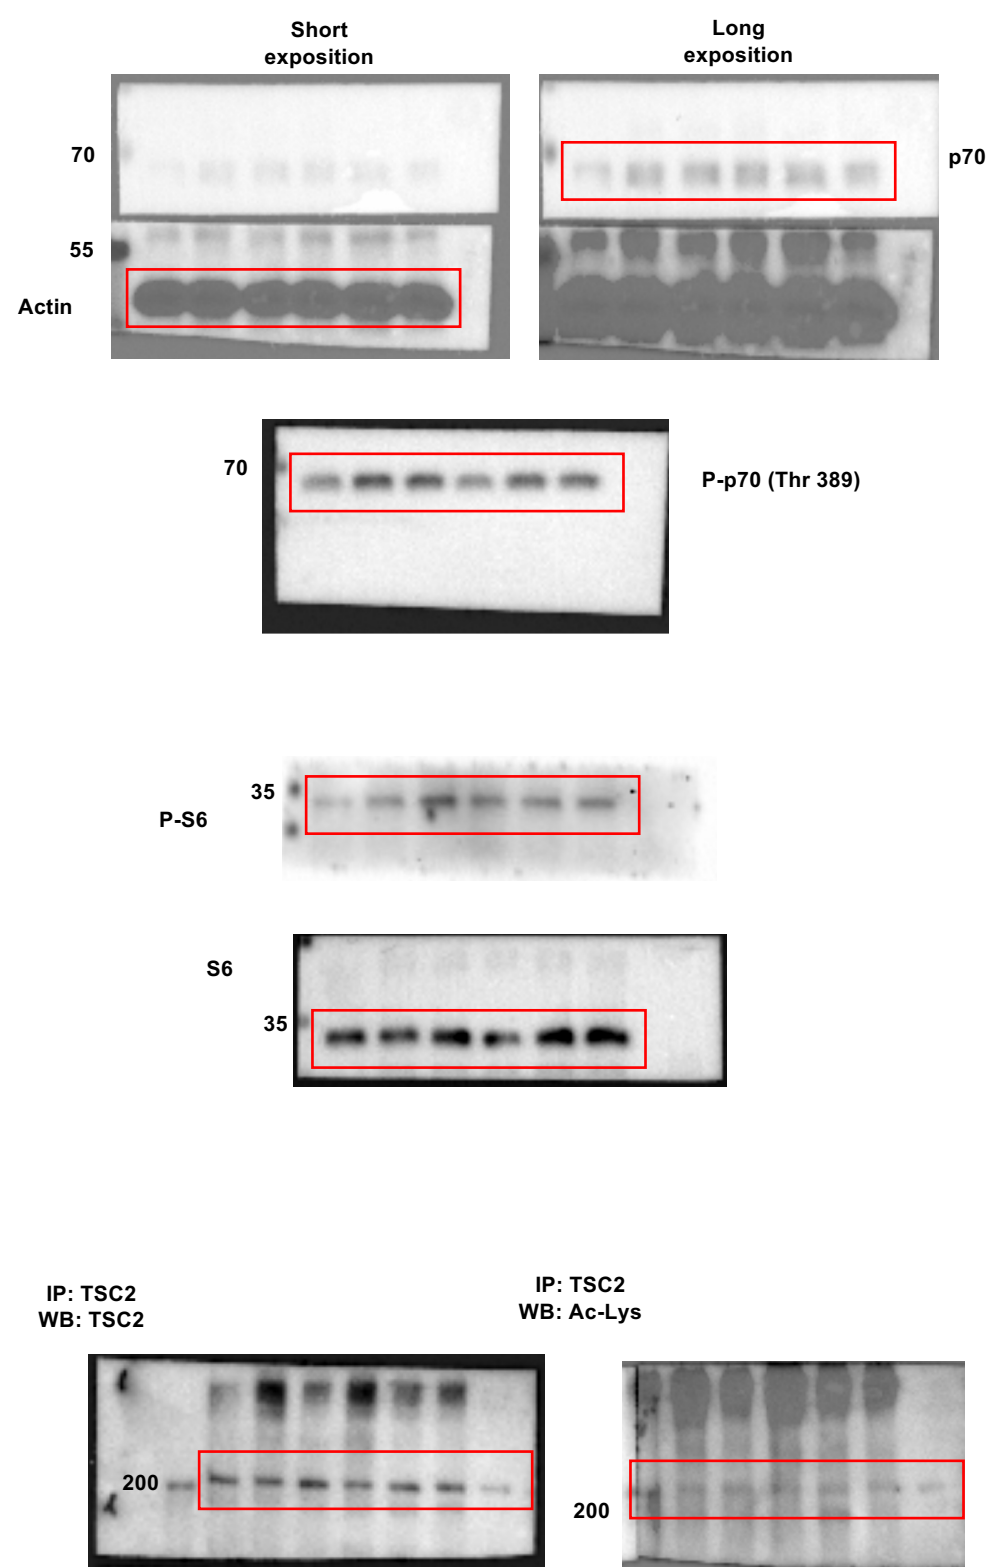

Figure 2E

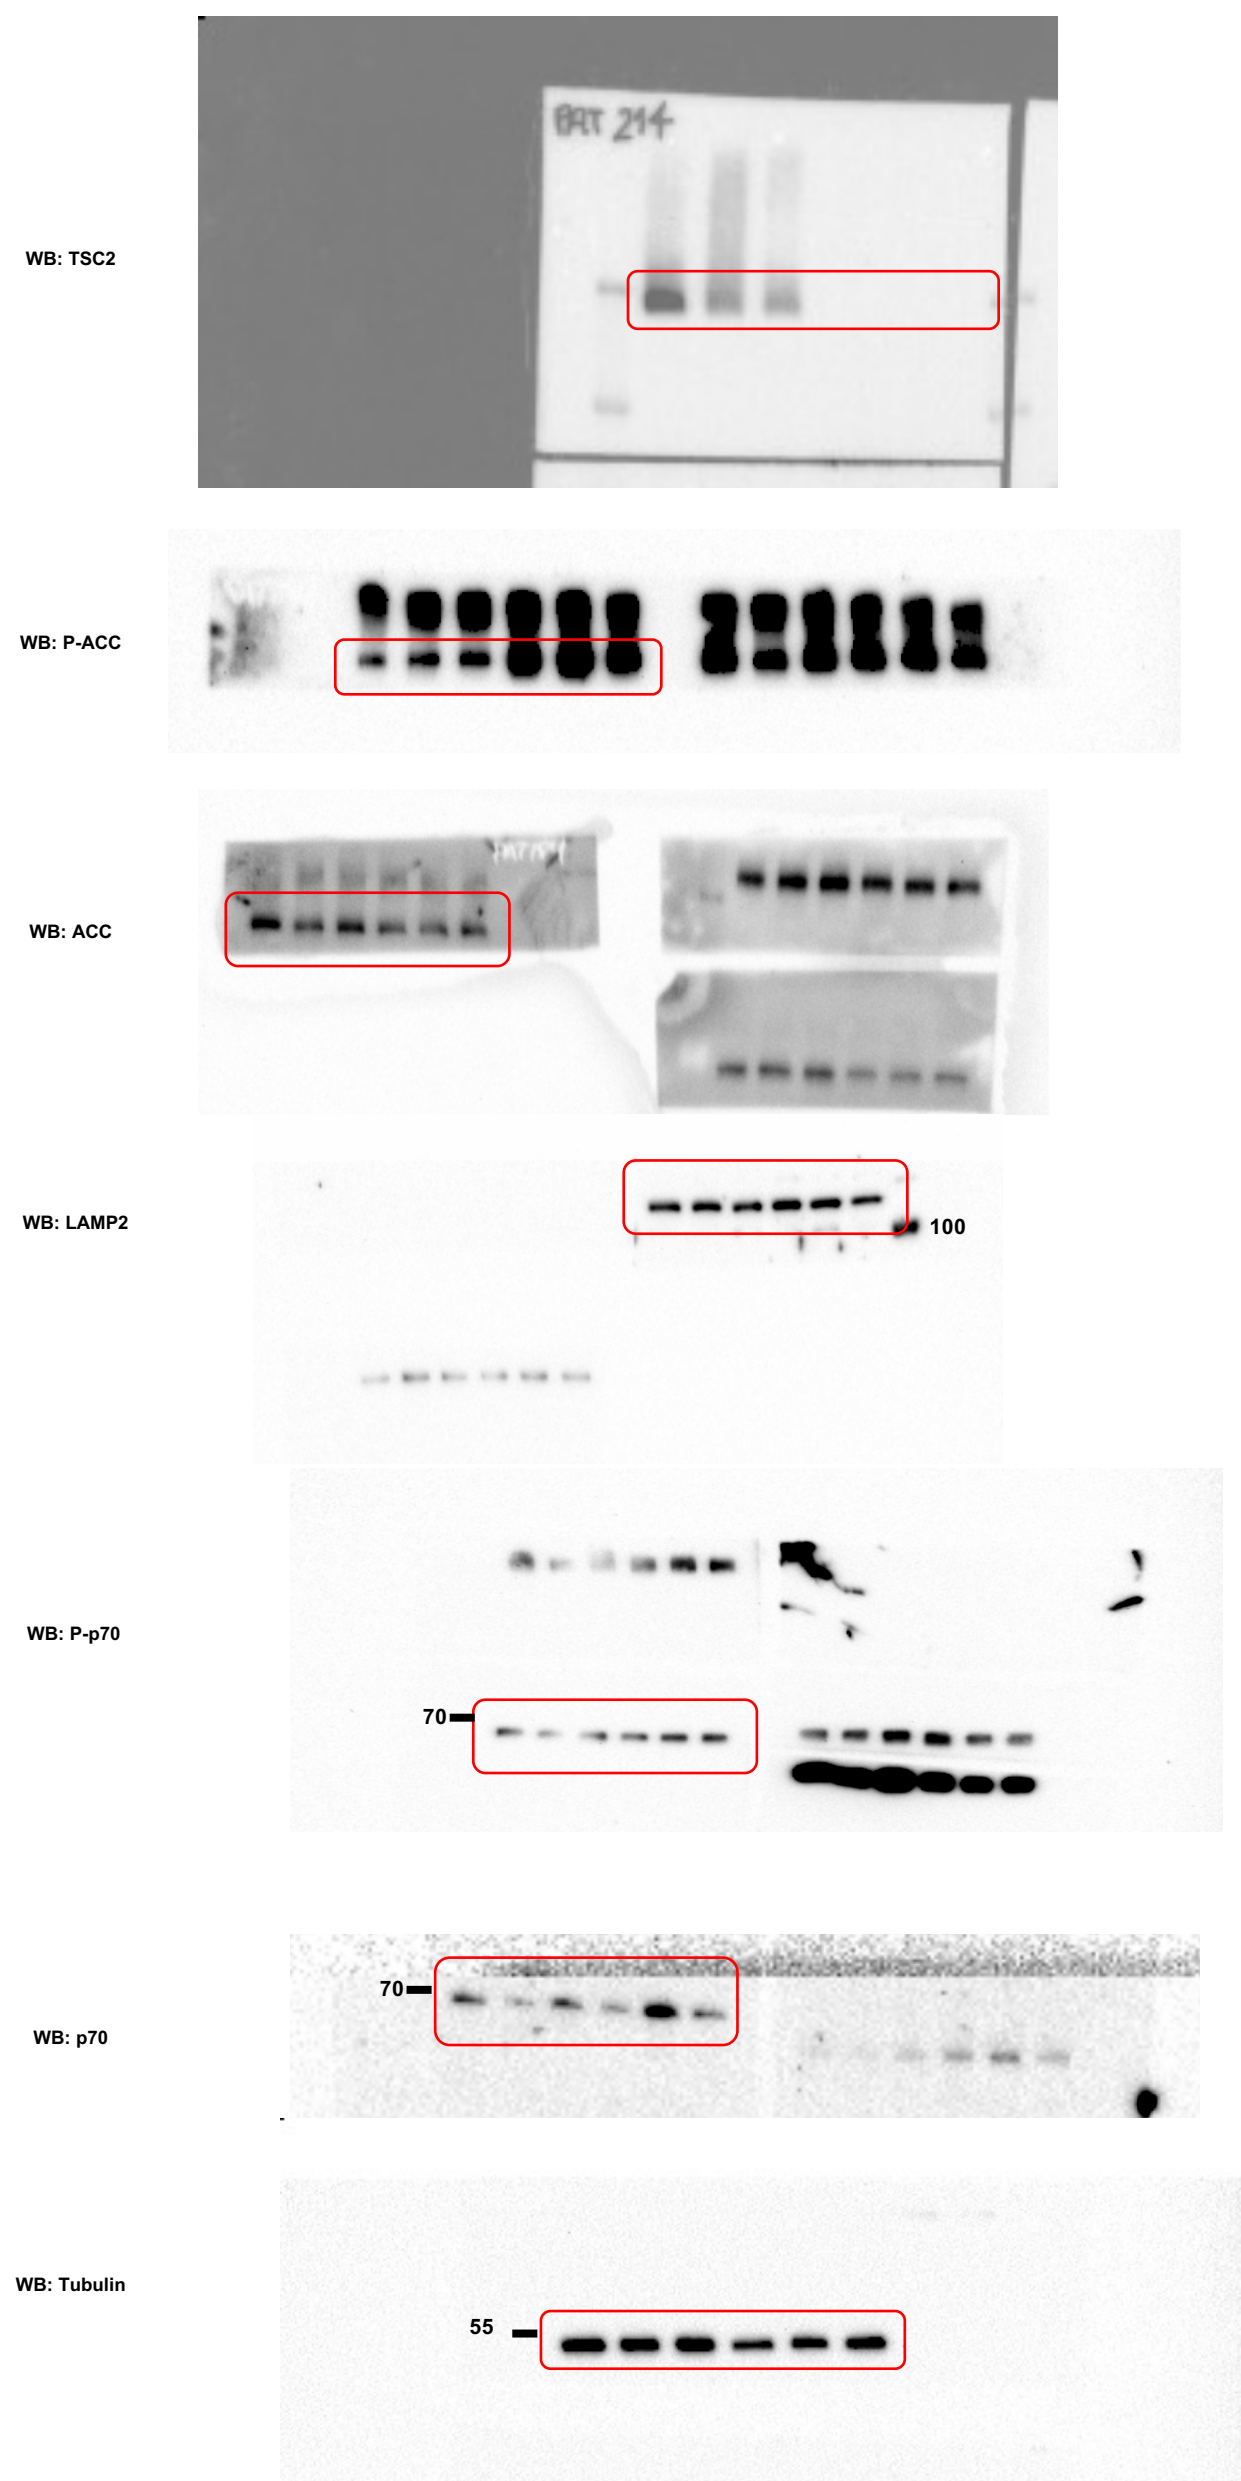

Figure 3A

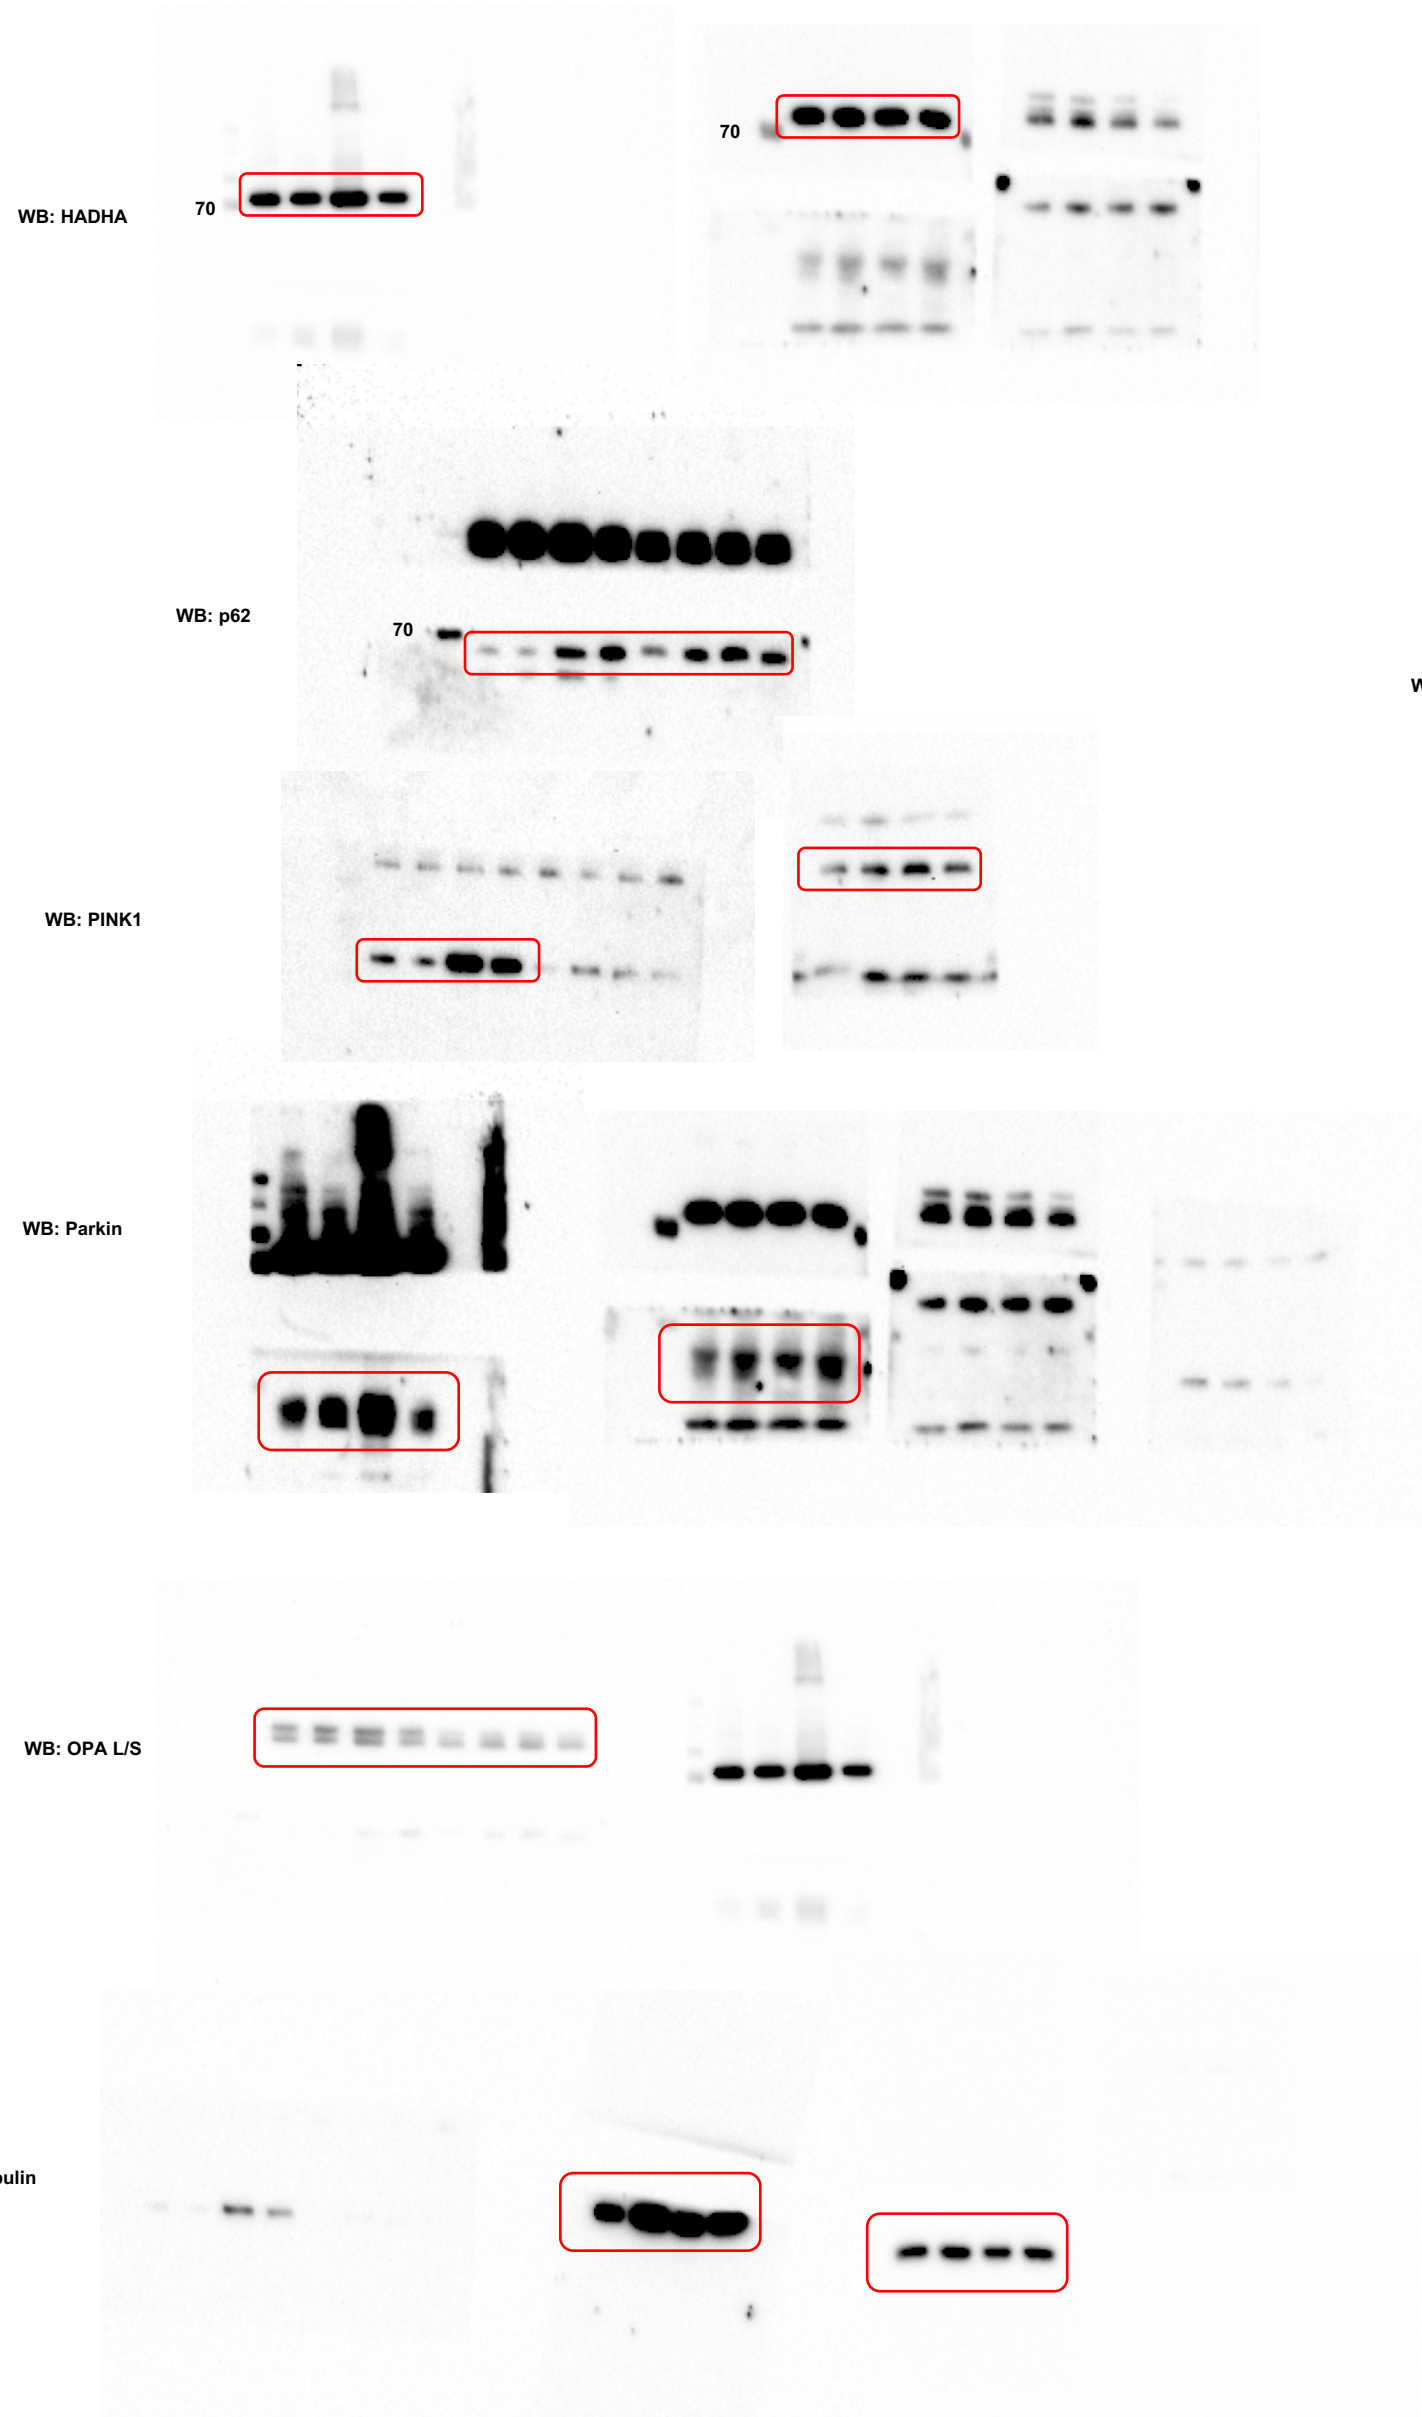

Figure 3D

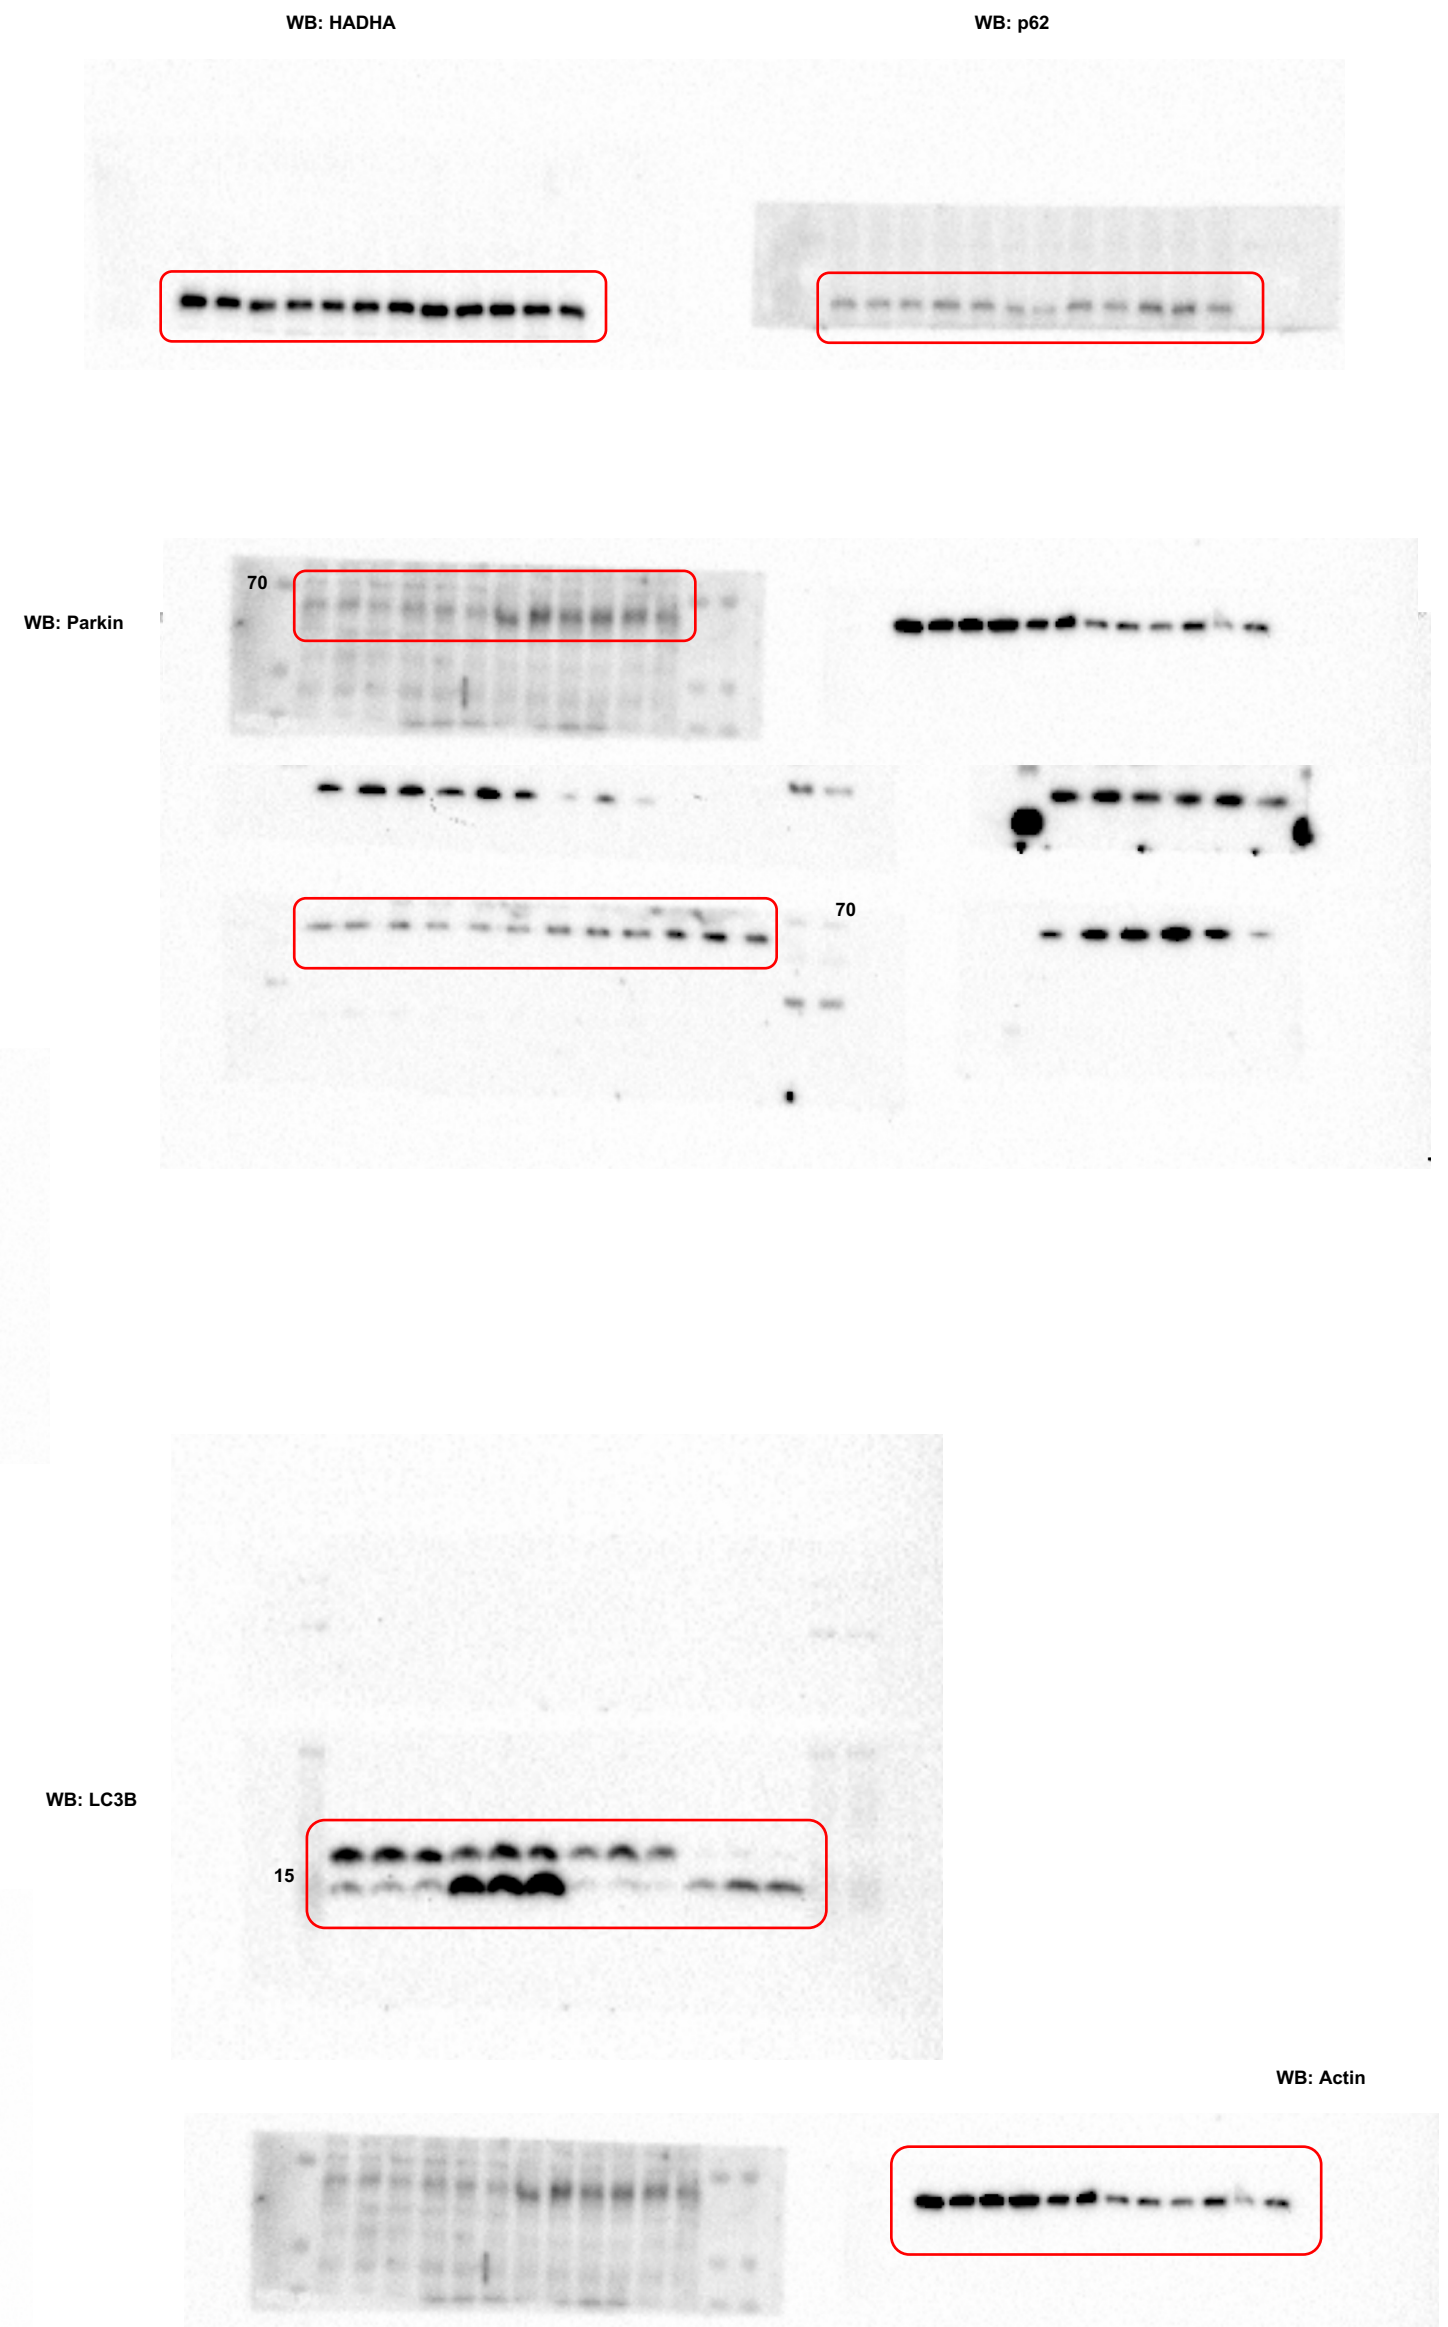

Figure 4A

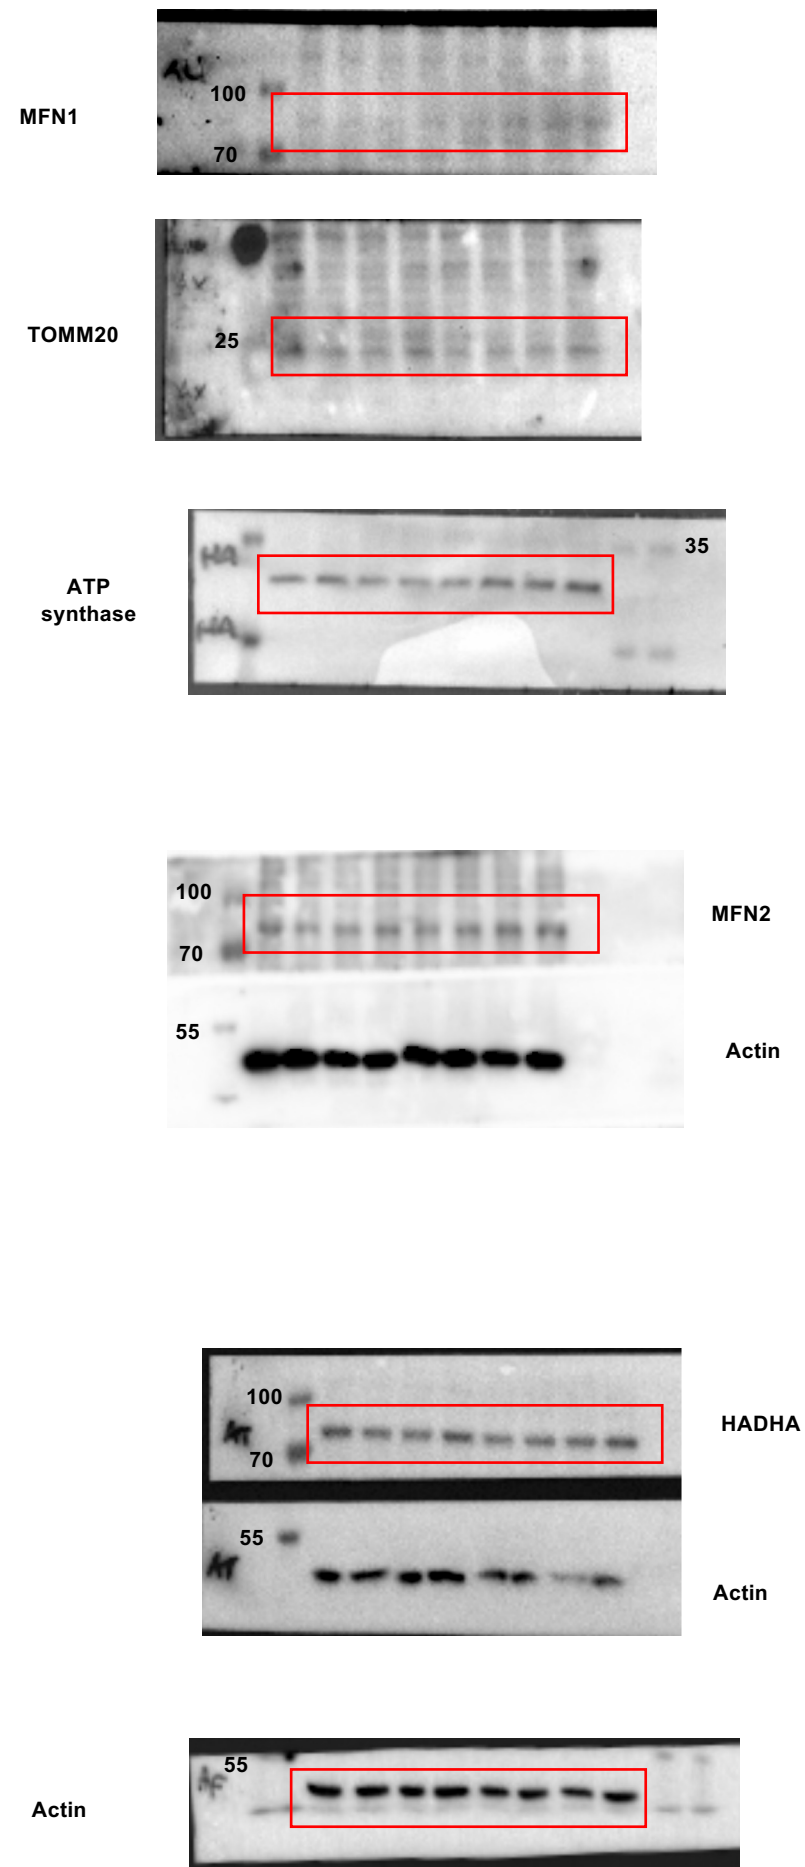

Figure 4B

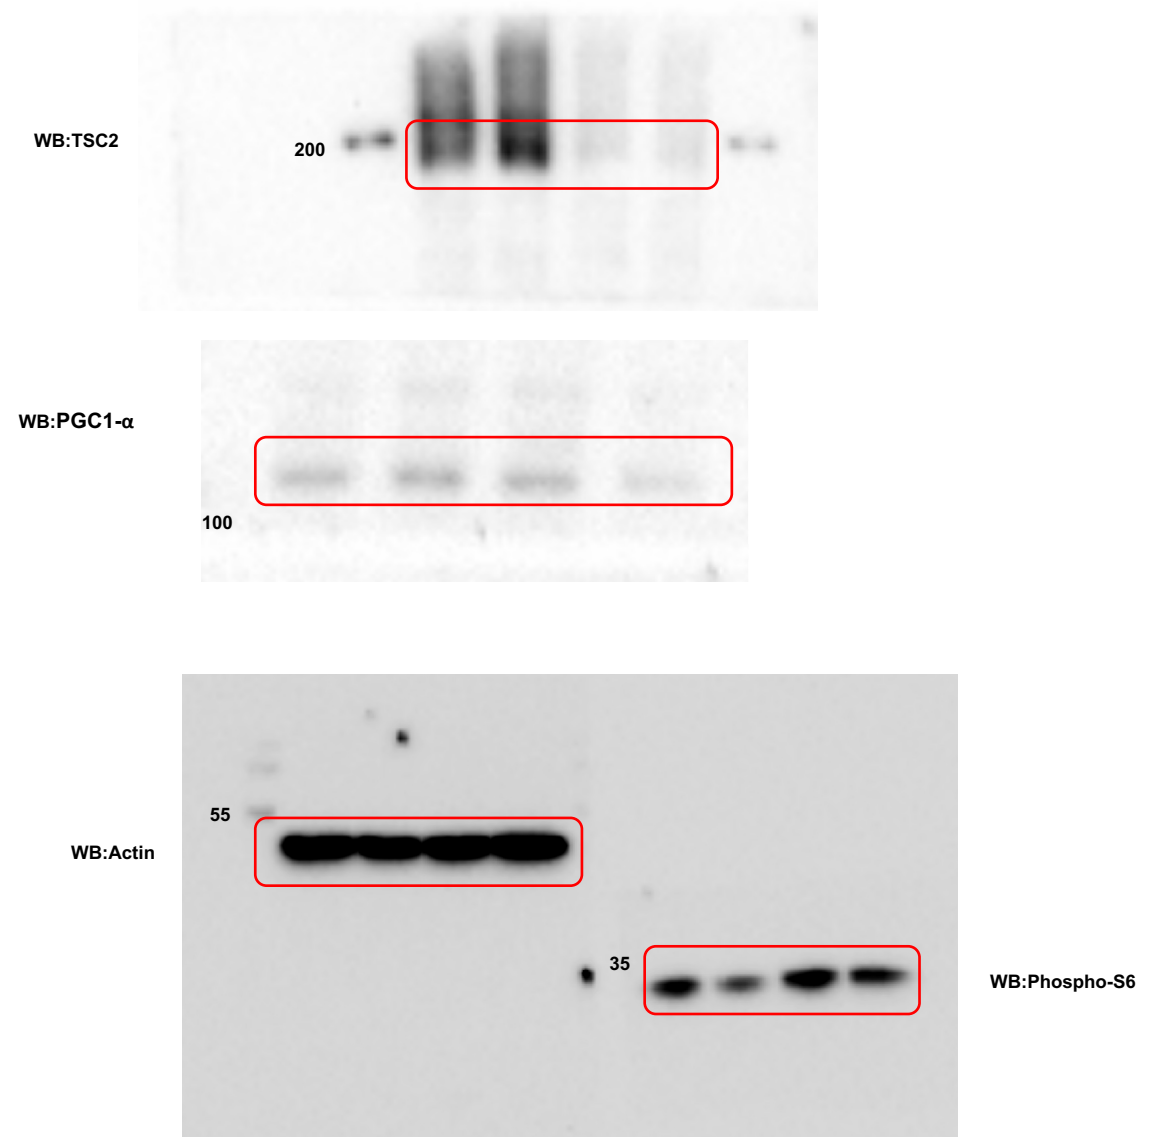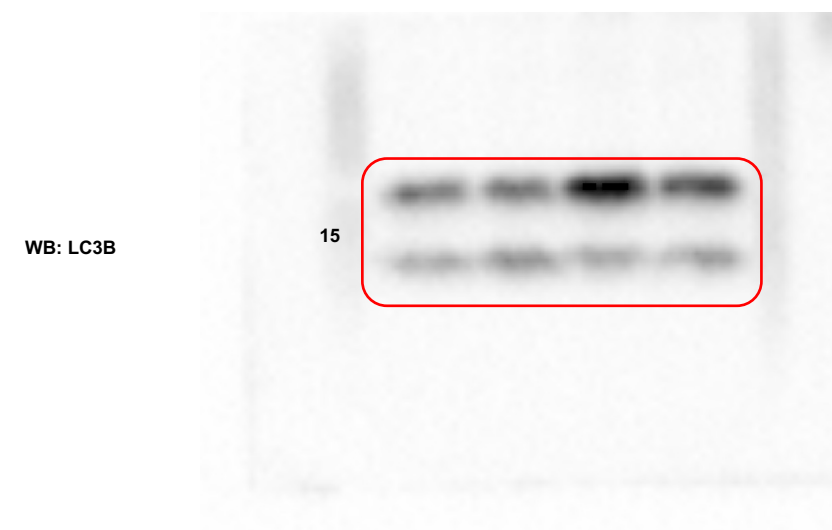

IP:PGC1-alpha  
WB:PGC1-alpha

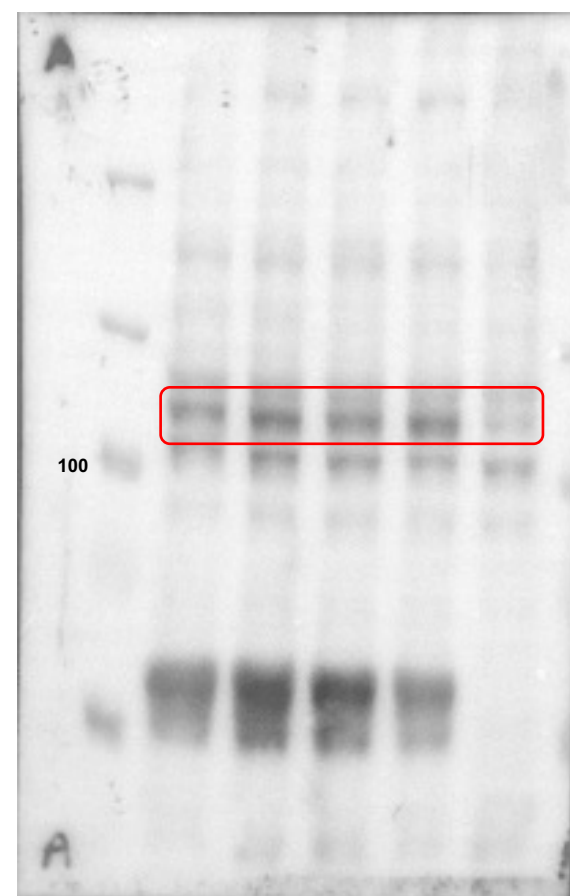

IP:PGC1-alpha  
WB:Ac-Lys

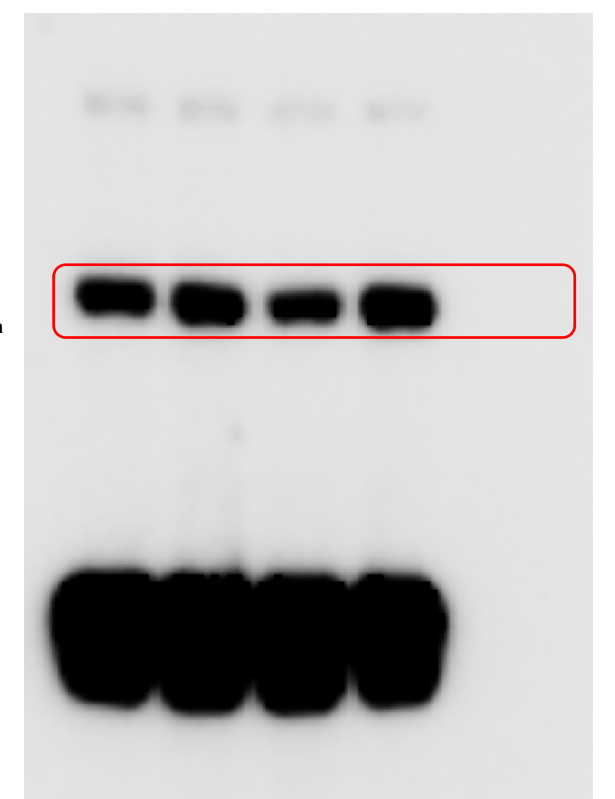

## Supplementary Figure 2

WB: P-p70  
(Thr 389)

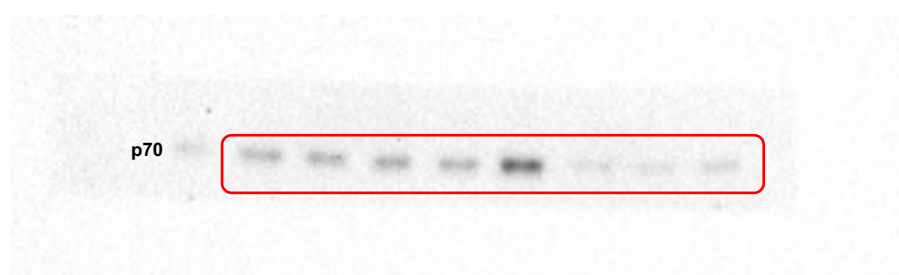

WB: p70

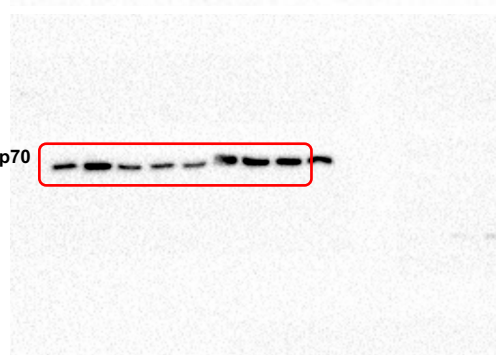

WB: Actin

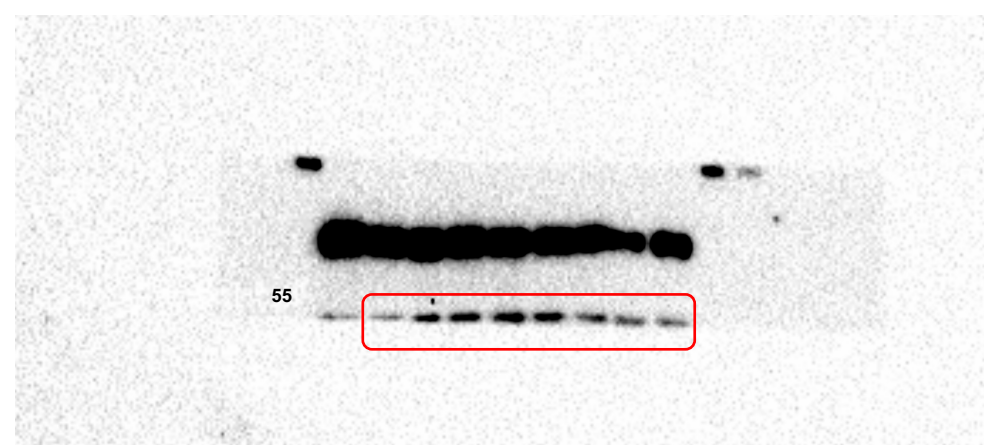

Supplemental Figure 3

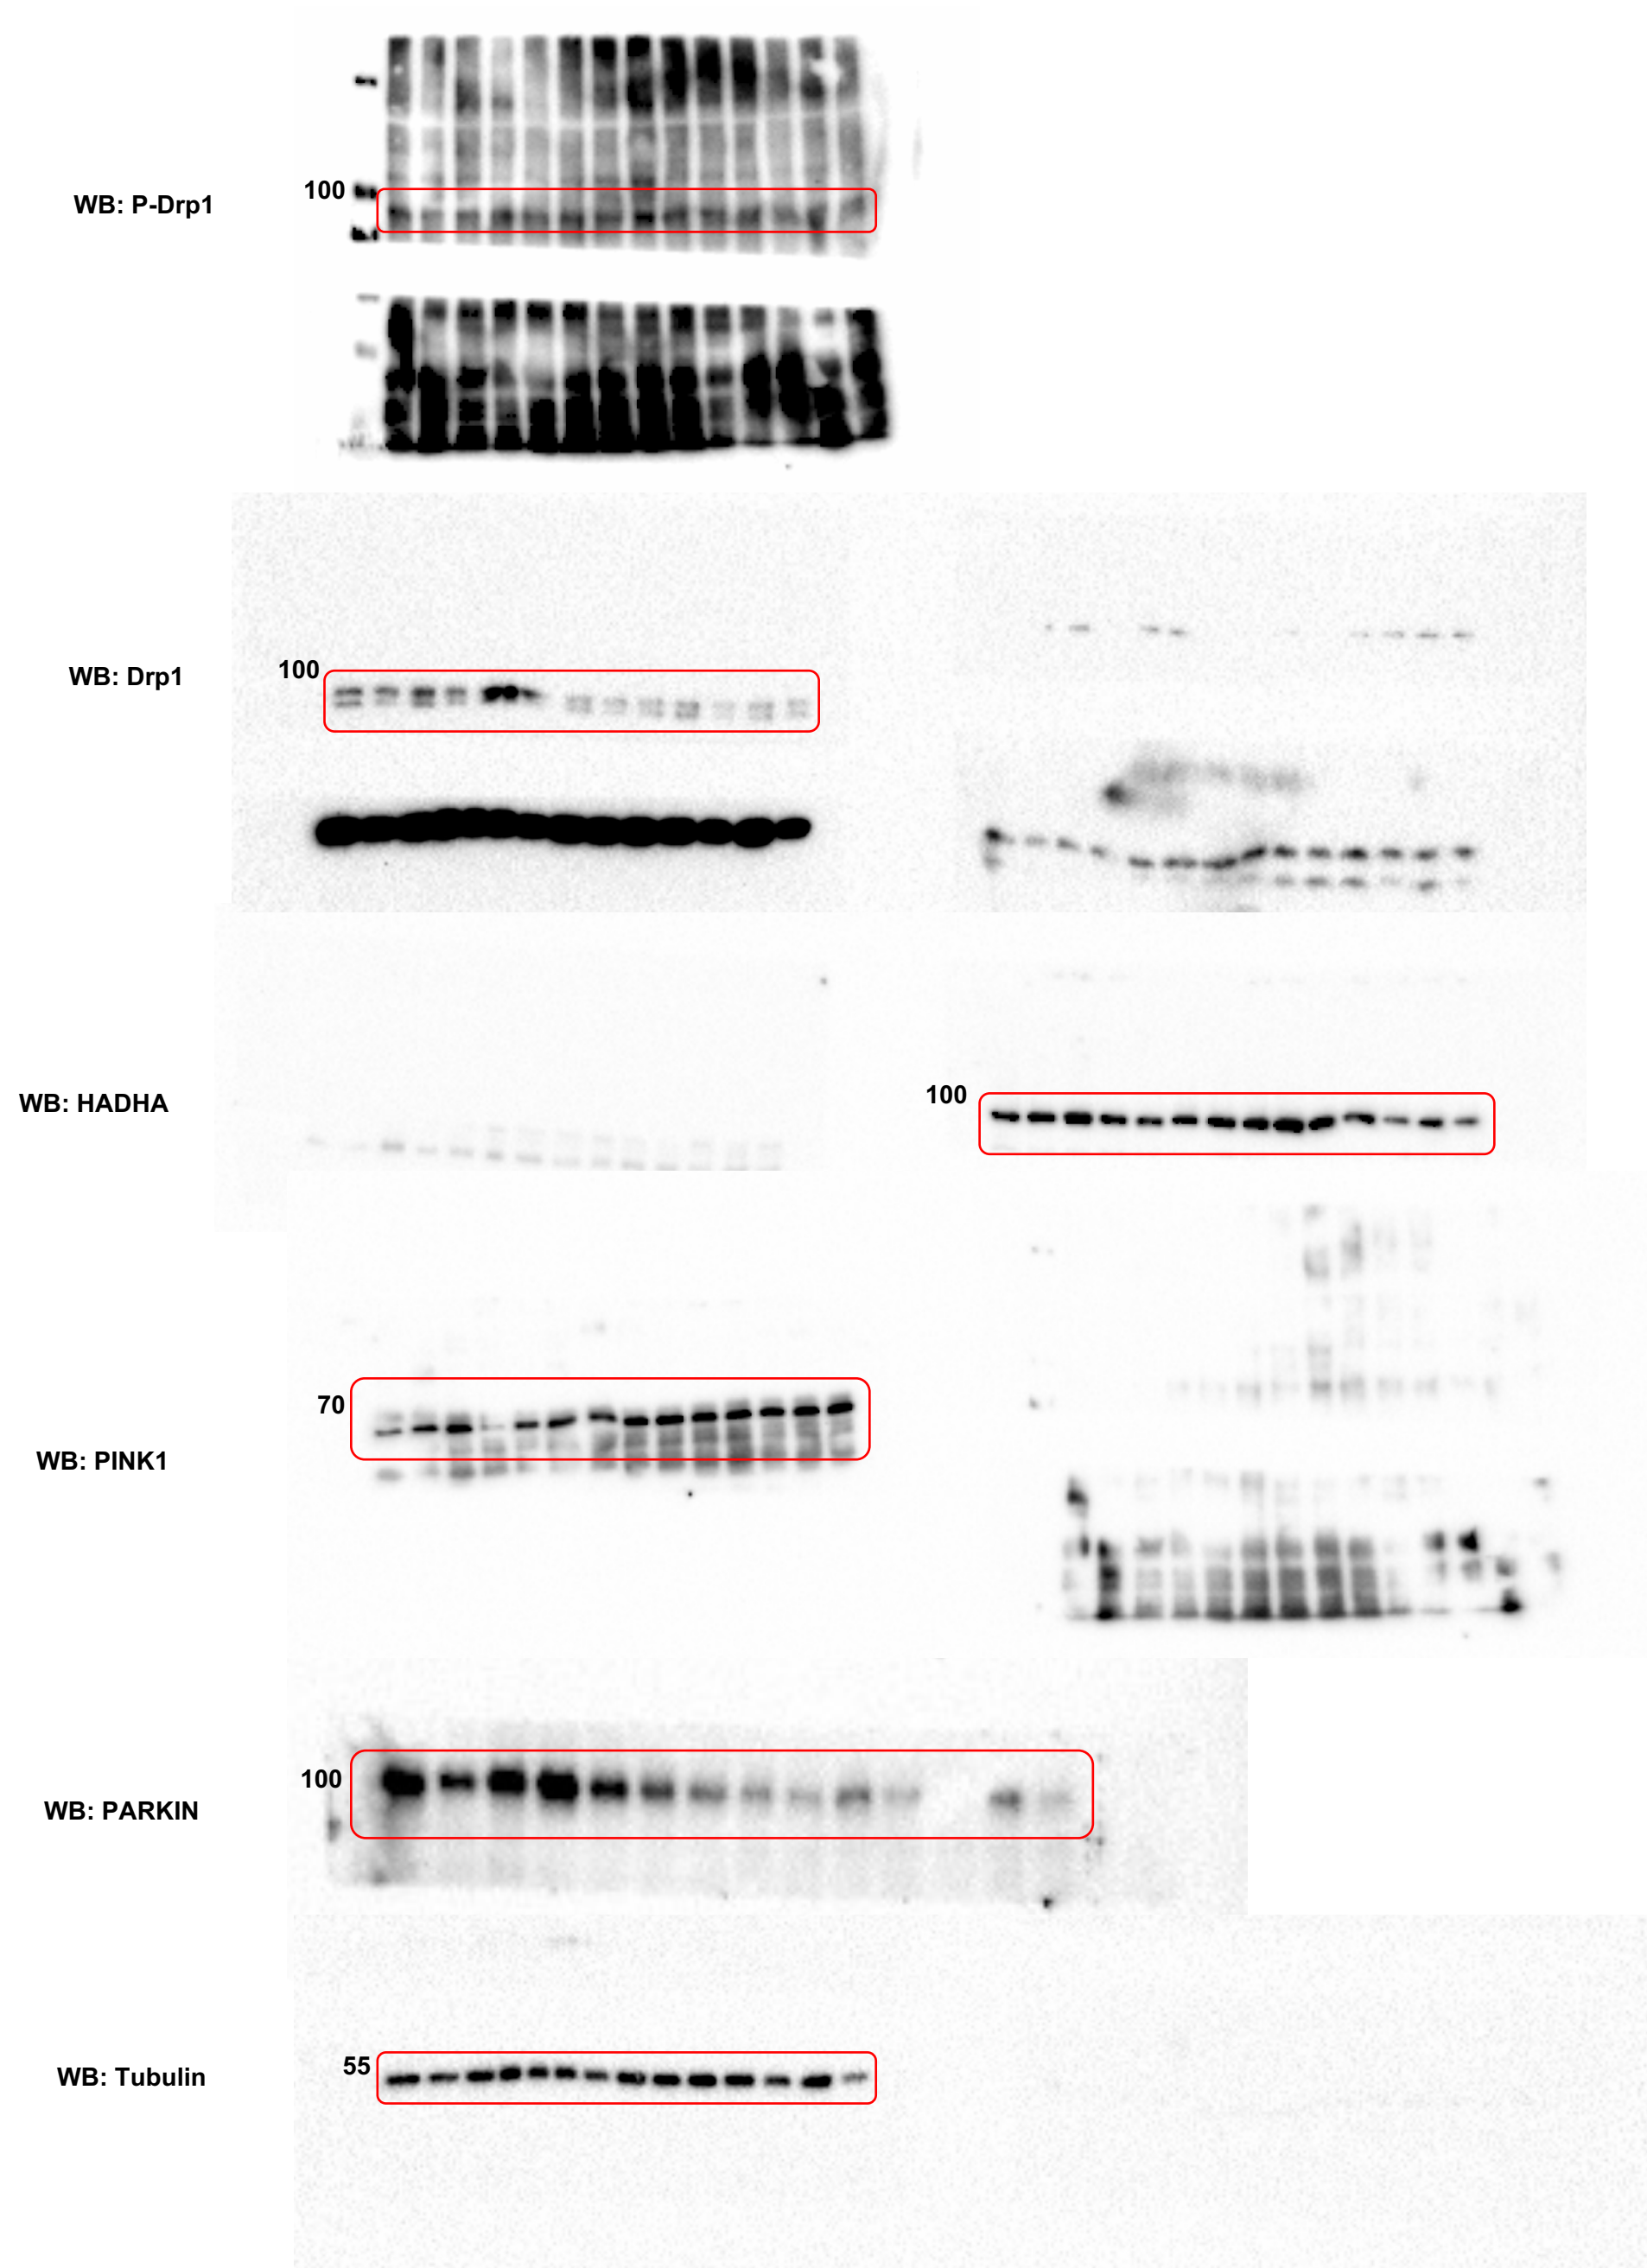

Supplement: 41598_2024_63525_MOESM1_ESM.pdf [file 41598_2024_63525_MOESM1_ESM.pdf]
